# Supplementary material
Source: Springer Nature journal article supplement (https://www.springermedizin.de/resource/supplementary/13054_2011_539_MOESM1_ESM.pdf/9708726)

# APACHE II -score $\leq 25$

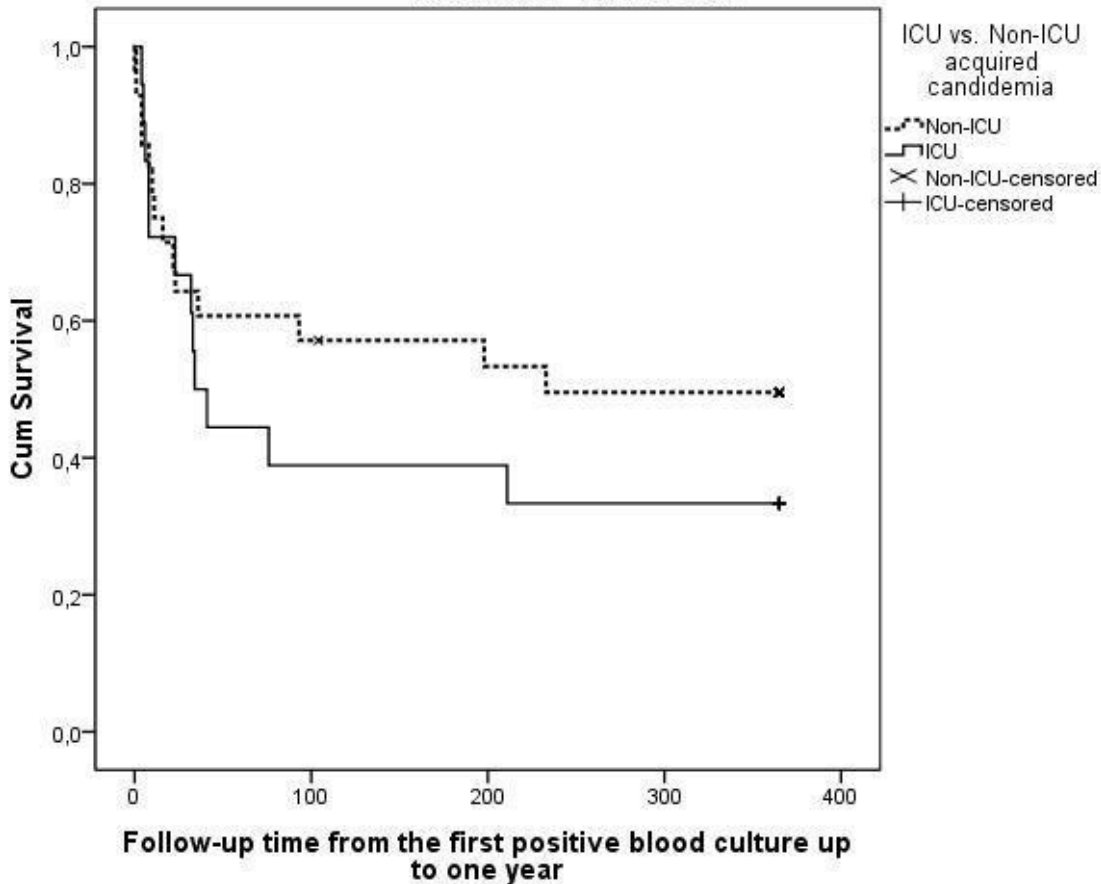

Supplement: MOESM1 [file 9708726]
